# Supplementary material for: Evidence summaries (decision boxes) to prepare clinicians for shared decision-making with patients: a mixed methods implementation study
Source: Springer Nature journal article supplement (doi:10.1186/s13012-014-0144-6), 2014-10-04
Supplement: MOESM2 [file 9772816]

## **Additional file 2**

Structured interview guides used in (a) the focus groups with doctors, residents, and nurses, and (b) the individual interviews with the medical director of each clinic

### **(a) Focus groups with clinicians**

- How did you use what you have learned from the decision boxes?
- How easy is it to use what you have learned from decision boxes in clinical encounters with patients?
- What resources are required for an appropriate application of what you have learned from the decision boxes?
- How can your clinic facilitate the use of what you have learned from the decision boxes in your everyday practice?
- Do you believe you can use the information presented in the decision boxes in a sustained manner (in the long run)?
- How does the way you work as a team influence your use of what you have learned from decision boxes in clinical encounters with patients?
- How does the information delivered by the decision boxes facilitate (or hinder) teamwork?
- According to you, what would be the best way to use the information delivered by decision boxes in primary care settings?
- Within your team, who do you think benefits the most from what you have learned from the decision boxes?

### **(b) Individual interviews with the clinics' medical directors**

- How did the professionals from your team use what they have learned from the decision boxes?
  - How easy do you think it is for the professionals from your team to use what they have learned from the decision boxes in clinical encounters with their patients?
  - Do you believe that using the information presented in the decision boxes can be incorporated into your care practices in a sustained manner (in the long run)?
  - How can your clinic facilitate use of the information provided in decision boxes in its practice? What internal resources at your clinic could be used to facilitate this use?
  - What characteristics of your clinic and of the usual practice of your professionals, facilitate/hinder the use of what has been learned from the decision boxes?
  - How is the daily workload of professionals affected by what has been learned from decision boxes in clinical encounters?
-
