# Supplementary figures and images for: Evidence summaries (decision boxes) to prepare clinicians for shared decision-making with patients: a mixed methods implementation study
Source: Springer Nature journal article supplement (doi:10.1186/s13012-014-0144-6), 2014-10-04

Figure 3:

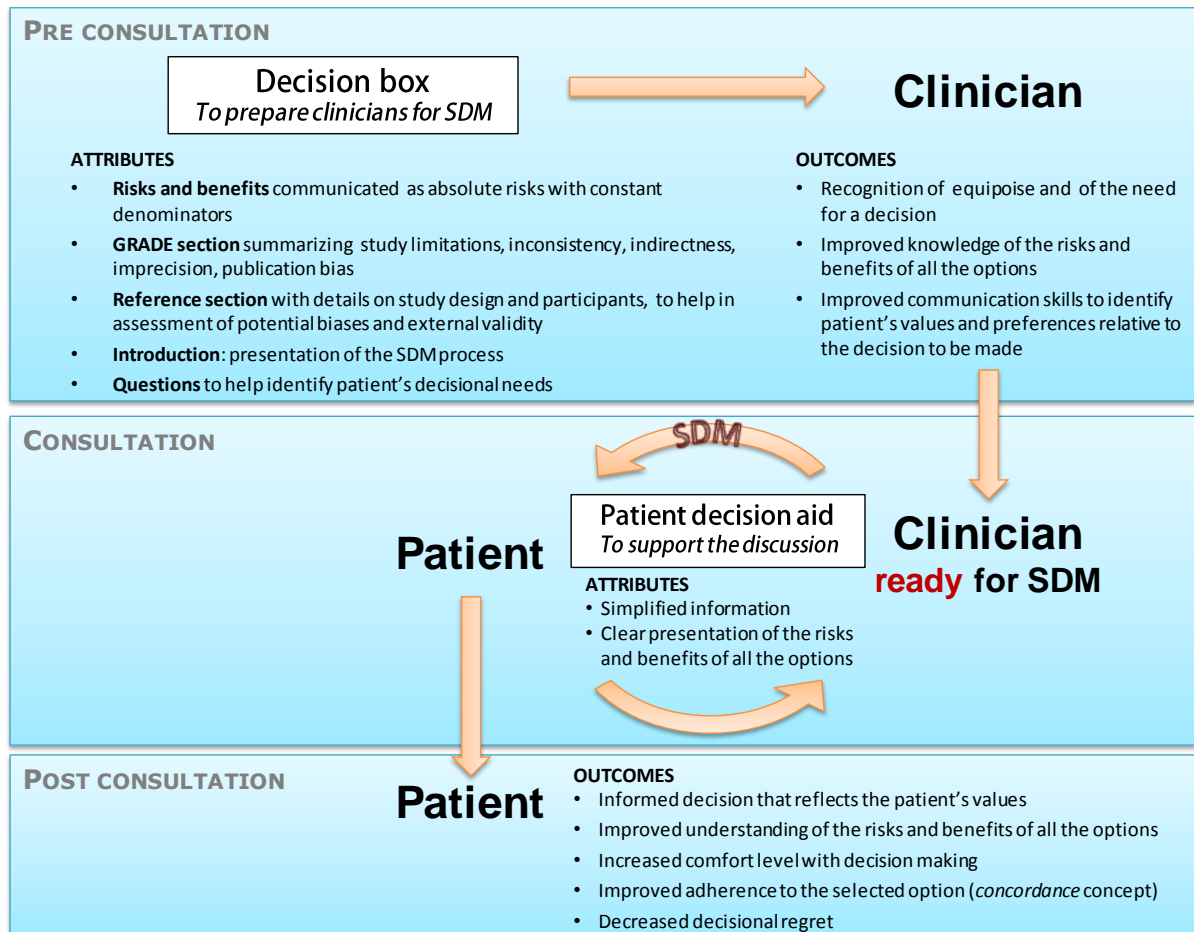

Supplement: MOESM6 [file 9772816]
